# Supplementary material for: Sources of carbon to suspended particulate organic matter in the northern Gulf of Mexico
Source: Oxford University Press journal article supplement (doi:10.1525/elementa.389), 2019-01-01
Supplement: elementa-7-389-s1.xlsx [file elementa-7-389-s1.xlsx]

## Sheet: Table S1
Table S1. POCsusp sample collection and isotope data
Collection Date	Cruise	Event	Station	Latitude	Longitude	Site Type	Depth (m)	Filter size (μm)	Water volume (L)	δ13C (‰)	δ13Ccorr (‰)	µmol C/L 13C Method	µmol C/L 14C method	Analysis number	Year analyzed	µmol CO2 sent	14C age, years BP	±	Fm	±	pMC	±	Δ14C (‰)	±	Δ14Ccorr (‰)	±	Salinity
2010-08-22	OC468	1.09	MC295	28.7085	–88.4267	NCG	75	0.7	6.8	–20.7	–20.4	4.736	3.60966	WHOI 118490	2013	19.157	165	25	0.9795	0.003	97.95	0.3	–27.6	3	–7.8	7.23401	36.5269
2010-08-22	OC468	1.09	MC295	28.7085	–88.4267	NCG	145	0.7	10	–21.4	–21.1	3.77416	2.41207	WHOI 118483	2013	18.8383	415	25	0.9495	0.0027	94.95	0.27	–57.4	2.7	–38.6	5.08143	36.3666
2010-08-22	OC468	1.09	MC295	28.7085	–88.4267	NCG	1400	0.7	15.7	–25.0	–24.5	2.2494	1.44165	WHOI 118489	2013	17.7232	1080	30	0.8742	0.0035	87.42	0.35	–132.1	3.5	–115.5	4.60941	34.9646
2010-08-26	OC468	3.1	AT472	27.5308	–88.2907	NCG	2	0.7	16.4	–22.6	–22.4	3.33268	2.27379	WHOI 118487	2013	28.7154	560	25	0.9324	0.0027	93.24	0.27	–74.3	2.6	–62.6	4.58352	34.9982
2010-08-26	OC468	4.01	AT447	27.496	–89.6117	NCG	856	0.7	6	–22.4	–21.8	3.73806	3.20589	UGAMS 17607	2014	15.1743	590	30	0.9293	0.003	92.93	0.3	–70.7	3	–47.8	5.085	34.9231
2010-08-26	OC468	4.01	AT447	27.496	–89.6117	NCG	1040	0.7	13.9	–30.3	–29.5	2.79733	1.55193	WHOI 118488	2013	16.9266	5830	35	0.484	0.002	48.4	0.2	–519.5	2	–521.1	3.14813	34.9455
2010-08-26	OC468	4.01	AT447	27.496	–89.6117	NCG	1055	0.7	17.8	–28.8	–28.0	1.73853	0.794243	WHOI 118484	2013	11.3509	4260	35	0.5881	0.0024	58.81	0.24	–416.2	2.4	–410.8	3.27561	34.9467
2010-08-26	OC468	4.01	AT447	27.496	–89.6117	NCG	1100	0.7	14.2	–25.7	–24.7	1.43861	0.884405	LLNL 166144	2014	10.1667	685	35	0.918056	0.00360368	91.81	0.36	–89.0	3.60368	–55.4	5.32302	34.9502
2010-08-26	OC468	4.01	AT447	27.496	–89.6117	NCG	1200	0.7	8.5	–23.9	–22.0	0.91998	0.693163	LLNL 166145	2014	5.16667	1580	60	0.821879	0.00540158	82.19	0.54	–184.5	5.40158	–129.7	5.47488	34.9599
2010-08-27	OC468	5.01	AT443	27.4767	–89.8120	NCG	870	0.7	18.9	–24.3	–23.6	1.26107	1.16385	UGAMS 17608	2013	17.2453	2370	30	0.7474	0.0028	74.47	0.28	–255.3	2.8	–244.1	3.60259	34.9267
2010-08-27	OC468	5.01	AT443	27.4767	–89.8120	NCG	950	0.7	11.7	–22.6	–21.6	1.13136	0.949924	LLNL 166146	2014	9.08333	1140	35	0.867755	0.00352169	86.78	0.35	–138.9	3.52169	–105.7	4.55919	34.9346
2010-08-27	OC468	5.01	AT443	27.4767	–89.8120	NCG	1000	0.7	18.2	–29.0	–28.4	2.17929	1.25529	WHOI 118480	2013	17.8825	5830	35	0.4841	0.0022	48.41	0.22	–519.4	2.2	–520.8	3.18224	34.943
2010-08-27	OC468	5.01	AT443	27.4767	–89.8120	NCG	1050	0.7	12.5	–31.7	–30.1	1.59271	1.09357	LLNL 166147	2014	11	7190	70	0.408663	0.00336223	40.87	0.34	–594.5	3.36223	–602.7	3.37929	34.9462
2010-08-27	OC468	5.01	AT443	27.4767	–89.8120	NCG	1100	0.7	18.2	–26.7	–26.0	1.85066	1.38367	WHOI 118491	2013	19.6349	3450	30	0.6508	0.0023	65.08	0.23	–353.9	2.3	–348.3	3.29805	34.9505
2010-08-27	OC468	5.01	AT443	27.4767	–89.8120	NCG	1200	0.7	19.2	–25.4	–24.9	2.01422	1.51074	WHOI 118482	2013	22.5024	2530	30	0.7296	0.0026	72.96	0.26	–275.7	2.6	–268.0	3.48619	34.9551
2010-08-27	OC468	6.07	AT446	27.4967	–89.6098	NCG	2	0.7	8.9	–20.1	–19.9	5.51884	5.5503	WHOI 118481	2013	37.796	>Modern	--	1.0046	0.0028	100.46	0.28	–2.6	2.5	7.7	18.015	32.5448
2010-08-27	OC468	6.07	AT446	27.4967	–89.6098	NCG	70	0.7	18.5	–23.1	–22.8	2.58499	1.64828	WHOI 118492	2013	23.6176	595	25	0.9285	0.0026	92.85	0.26	–78.3	2.7	–64.1	4.61583	36.5222
2010-08-27	OC468	6.11	AT446	27.3813	–89.6212	NCG	100	0.7	19.2	–21.0	–21.6	1.61024	2.16346	UGAMS 17606	2014	31.9016	210	20	0.9742	0.0028	97.42	0.28	–25.8	2.8	–14.1	7.02858	36.4629
2010-08-27	OC468	6.07	AT446	27.4967	–89.6098	NCG	200	0.7	15	–21.9	–23.5	2.26312	1.53725	UGAMS 17609	2014	18.0418	510	20	0.9385	0.0029	93.85	0.29	–61.5	2.9	–42.0	5.20742	35.9535
2010-08-27	OC468	6.07	AT446	27.4967	–89.6098	NCG	840	0.7	11.4	–25.2	–23.5	0.941851	0.546072	LLNL 166148	2014	5.41667	2810	60	0.704935	0.0050432	70.49	0.5	–300.5	5.0432	–268.5	4.49102	34.9235
2010-08-27	OC468	6.07	AT446	27.4967	–89.6098	NCG	880	0.7	10.7	–27.0	–20.6	0.515232	0.529875	LLNL 166149	2014	5	1800	60	0.798765	0.0054174	79.88	0.54	–207.4	5.4174	–154.8	5.26802	34.9282
2010-09-07	OC468	17.03	MC118	28.8534	–88.4881	NCG	40	0.7	15	–24.2	–24.2	4.38618	4.9075	WHOI 118486	2013	55.9571	>Modern	--	1.0154	0.0025	101.54	0.25	8.06	2.4	15.2	10.2063	36.5403
2012-09-06	EN515	2.01	OC26	28.7359	–88.3795	NCG	1	0.7	12.5	–24.4	–24.4	--a	1.44334	--	2017	18.0418	--	--	--	--	--	--	--	--	--	--	35.7753
2012-09-06	EN515	2.01	OC26	28.7359	–88.3795	NCG	500	0.7	18.9	–24.4	–24.4	--	0.592146	--	2017	11.1916	--	--	--	--	--	--	--	--	--	--	34.9824
2012-09-06	EN515	2.01	OC26	28.7359	–88.3795	NCG	750	0.7	18.5	–25.3	–25.4	--	0.346612	--	2017	6.41232	--	--	--	--	--	--	--	--	--	--	34.8888
2012-09-06	EN515	2.01	OC26	28.7359	–88.3795	NCG	1497	0.7	17.8	–26.7	–27.0	--	0.369193	--	2017	6.57163	--	--	--	--	--	--	--	--	--	--	34.9464
2012-09-08	EN515	3.11	GC600	27.3662	–90.5648	Seep	1	0.7	18.5	–21.8	–19.6	3.99126	2.79454	UGAMS 17575	2014	51.8151	120	20	0.9846	0.0027	98.46	0.27	–15.4	2.7	20	8.1885	36.2169
2012-09-08	EN515	3.11	GC600	27.3662	–90.5648	Seep	80	0.7	18.9	–25.2	–22.3	6.09507	2.64205	--	--	51.4965	--	--	--	--	--	--	--	--	--	--	36.3753
2012-09-09	EN515	4.01	Shallow	28.3372	–89.9758	NCG	10	0.7	11.7	–21.1	–20.0	11.3008	--	--	--	--	--	--	--	--	--	--	--	--	--	--	31.2971
2012-09-09	EN515	4.01	Shallow	28.3372	–89.9758	NCG	111	0.7	10	–25.6	–21.9	6.46935	--	--	--	--	--	--	--	--	--	--	--	--	--	--	36.3998
2012-09-09	EN515	5.02	Shallow	28.672	–89.3656	NCG	1	0.7	9.2	–22.1	–21.5	14.2029	30.3145	UGAMS 17580	2014	267.359	Modern	--	1.0467	0.0029	104.67	0.29	46.7	2.9	53.9	5.28641	32.7508
2012-09-09	EN515	5.02	Shallow	28.672	–89.3656	NCG	1	0.7	9.2	–21.2	–19.9	9.72764	--	--	--	--	--	--	--	--	--	--	--	--	--	--	32.7508
2012-09-09	EN515	5.01	Shallow	28.672	–89.3656	NCG	16	0.7	3.4	–21.0	–19.4	28.7736	--	--	--	--	--	--	--	--	--	--	--	--	--	--	35.0899
2012-09-09	EN515	5.01	Shallow	28.672	–89.3656	NCG	55	0.7	9.3	–24.6	–17.8	6.31706	--	--	--	--	--	--	--	--	--	--	--	--	--	--	36.3766
2012-09-09	EN515	5.02	Shallow	28.672	–89.3656	NCG	80	0.7	19.2	–24.3	–22.6	3.62187	--	--	--	--	--	--	--	--	--	--	--	--	--	--	36.39
2012-09-09	EN515	5.01	Shallow	28.672	–89.3656	NCG	132	0.7	6.8	–23.6	–20.8	17.8584	5.82855	UGAMS 17581	2014	41.4601	1510	20	0.8281	0.0024	82.81	0.24	–171.9	2.4	–137.3	2.89754	36.2963
2012-09-10	EN515	7.01	Shallow	28.9572	–88.9443	NCG	1	0.7	4.3	–22.4	–20.6	18.7514	--	--	--	--	--	--	--	--	--	--	--	--	--	--	30.232
2012-09-10	EN515	7.01	Shallow	28.9572	–88.9443	NCG	20	0.7	9.6	–21.7	–18.4	6.12634	--	--	--	--	--	--	--	--	--	--	--	--	--	--	34.0628
2012-09-10	EN515	8.01	Shallow	29.2425	–88.5435	NCG	1	0.7	9.6	–23.8	–21.8	6.50999	--	--	--	--	--	--	--	--	--	--	--	--	--	--	34.7849
2012-09-10	EN515	8.01	Shallow	29.2425	–88.5435	NCG	60	0.7	2.8	–24.1	–21.8	16.1171	--	--	--	--	--	--	--	--	--	--	--	--	--	--	36.3578
2012-09-10	EN515	8.01	Shallow	29.2425	–88.5435	NCG	72	0.7	1.8	–23.5	–20.7	32.4603	--	--	--	--	--	--	--	--	--	--	--	--	--	--	36.3649
2012-09-13	EN515	11.06	Control	28.3211	–88.4034	NCG	1	0.7	12.1	–23.6	–20.8	3.5846	--	--	--	--	--	--	--	--	--	--	--	--	--	--	35.6782
2012-09-13	EN515	11.06	Control	28.3211	–88.4034	NCG	63	0.7	11.7	–25.2	–23.2	3.82859	--	--	--	--	--	--	--	--	--	--	--	--	--	--	36.382
2012-09-13	EN515	10.21	OC26	28.7412	–88.3674	NCG	1	0.7	19	–22.8	–20.8	3.01148	3.20051	--	--	58.8246	--	--	--	--	--	--	--	--	--	--	35.9856
2012-09-13	EN515	10.21	OC26	28.7412	–88.3674	NCG	82	0.7	19	–25.0	–23.4	3.73442	--	--	--	--	--	--	--	--	--	--	--	--	--	--	36.396
2012-09-13	EN515	10.21	OC26	28.7412	–88.3674	NCG	125	0.7	18.9	–25.9	–21.2	2.94173	1.11839	UGAMS 17583	2014	22.821	250	20	0.9696	0.0028	96.96	0.28	–30.4	2.8	54.2	6.19037	36.5709
2012-09-13	EN515	10.09	OC26	28.7473	–88.3688	NCG	1474	0.7	1.1	–26.6	–22.1	33.242	--	--	--	--	--	--	--	--	--	--	--	--	--	--	34.9501
2012-09-13	EN515	10.16	OC26	28.7408	–88.3672	NCG	82	0.7	17.1	–26.3	–26.4	--	1.00849	--	--	17.2453	--	--	--	--	--	--	--	--	--	--	36.5998
2012-09-14	EN515	11.01	CTRL1	28.326	–88.3913	NCG	1	0.7	--	–23.6	–23.6	--	--	--	--	31.7423	--	--	--	--	--	--	--	--	--	--	35.724
2012-09-14	EN515	11.01	CTRL1	28.326	–88.3913	NCG	50	0.7	--	–24.9	–25.0	--	--	--	--	23.7769	--	--	--	--	--	--	--	--	--	--	36.3421
2012-09-26	WB1305	CT21	Seep A	29.043	–87.2825	Seep	64.1	2.7	8.6	–28.2	–27.6	-109.495	1.95358	UGAMS 16556	2013	18.201	5470	35	0.5064	0.0022	50.64	0.22	–493.6	2.2	–468.0	2.29111	36
2012-09-28	WB1305	SEEP C	Seep C	28.9908	–88.0458	Seep	73	2.7	8.6	–26.3	–22.7	2.40183	--	--	--	--	--	--	--	--	--	--	--	--	--	--	36
2012-09-28	WB1305	SEEPC	Seep C	28.9908	–88.0458	Seep	349	2.7	8.6	–29.8	–26.8	1.45992	1.62349	--	--	13.4167	--	--	--	--	--	--	--	--	--	--	35
2012-09-28	WB1305	XC2	XC2	29.1232	–87.8652	Seep	1112	2.7	8.622	–29.2	–27.8	2.95478	2.57251	LLNL 166138	2013	23.1667	8640	45	0.341111	0.00187156	34.11	0.19	–661.5	1.87156	–664.3	2.15588	35
2012-09-28	WB1305	XC2	XC2	29.1232	–87.8652	Seep	895	2.7	8.62	–32.0	–30.8	1.65848	0.943503	--	--	9.91667	--	--	--	--	--	--	--	--	--	--	35
2012-10-03	WB1306	CT7	SeepC-2	28.9914	–88.0183	Seep	68	2.7	8.6	–25.2	–21.8	0.464926	--	--	--	--	--	--	--	--	--	--	--	--	--	--	36
2012-10-03	WB1306	CT7	SeepC-2	28.9914	–88.0183	Seep	85	2.7	8.6	–27.2	–22.2	0.473805	--	--	--	--	--	--	--	--	--	--	--	--	--	--	36
2012-10-03	WB1306	CT7	SeepC-2	28.9914	–88.0183	Seep	95	2.7	8.6	–27.5	–23.0	0.0818924	--	--	--	--	--	--	--	--	--	--	--	--	--	--	36
2012-10-04	WB1306	CT15	Peanut Seep	28.3246	–88.4465	Seep	5	2.7	8.6	–26.2	–23.1	2.45759	--	--	--	--	--	--	--	--	--	--	--	--	--	--	36
2012-10-04	WB1306	CT15	Peanut Seep	28.3246	–88.4465	Seep	65	2.7	8.6	–25.7	–22.2	1.29286	1.54435	--	--	14.537	--	--	--	--	--	--	--	--	--	--	36
2012-10-04	WB1306	CT15	Peanut Seep	28.3246	–88.4465	Seep	95	2.7	8.6	–27.8	–25.8	1.59677	--	--	--	--	--	--	--	--	--	--	--	--	--	--	36
2012-10-05	WB1306	AC5	AC5	28.5614	–87.3497	NCG	5	2.7	8.6	–27.4	–23.8	1.61873	--	--	--	--	--	--	--	--	--	--	--	--	--	--	36
2012-10-05	WB1306	CT23	AC5	28.5614	–87.3497	NCG	63	2.7	8.6	–27.1	–25.8	4.05097	2.12235	UGAMS 16548	2013	18.998	4670	35	0.5588	0.0024	55.88	0.24	–441.2	2.4	–409.2	2.38537	36
2012-10-05	WB1306	CT23	AC5	28.5614	–87.3497	NCG	75	2.7	8.6	–26.7	–23.6	1.08969	2.14767	--	--	11.192	--	--	--	--	--	--	--	--	--	--	36
2012-10-05	WB1306	CT23	AC5	28.5614	–87.3497	NCG	93	2.7	8.6	–28.1	–25.2	1.1901	1.48721	--	--	12.79	--	--	--	--	--	--	--	--	--	--	36
2012-10-05	WB1306	CT23	AC5	28.5614	–87.3497	NCG	1830	2.7	8.6	–28.4	–26.1	1.54494	--	--	--	--	--	--	--	--	--	--	--	--	--	--	35
2013-05-16	PE13-27	CTD4	CTD4	29.2464	–87.9358	NCG	6	0.7	20	–24.8	–24.3	6.53	5.94333	UGAMS 17588	2014	115.538	2020	20	0.778	0.002	77.76	0.22	–222.4	2.2	–212.1	2.61465	36
2013-05-16	PE13-27	CTD4	CTD4	29.2464	–87.9358	NCG	55	0.7	20	–25.3	–24.6	4.65985	--	--	--	--	--	--	--	--	--	--	--	--	--	--	36
2013-05-16	PE13-27	CTD4	CTD4	29.2464	–87.9358	NCG	66	0.7	20	–26.1	–25.5	4.52846	--	--	--	--	--	--	--	--	--	--	--	--	--	--	36
2013-05-16	PE13-27	CTD4	CTD4	29.2464	–87.9358	NCG	80	0.7	20	–27.1	–26.6	3.79889	3.95349	UGAMS 17589	2014	77.7823	2800	20	0.706	0.002	70.58	0.2	–294.2	2	–281.4	2.4	36
2013-05-16	PE13-27	CTD4	CTD4	29.2464	–87.9358	NCG	704	0.7	20	–27.8	–26.7	2.14648	2.82975	UGAMS 17590	2014	53.4082	6230	30	0.461	0.002	46.05	0.15	–539.5	1.5	–534.3	2.1	34
2013-05-16	PE13-27	CTD4	CTD4	29.2464	–87.9358	NCG	1031	0.7	20	–27.1	–26.3	3.06104	2.6608	UGAMS 17591	2014	51.8151	5220	30	0.522	0.002	52.22	0.17	–477.8	1.7	–468.8	2.2	34
2013-05-16	PE13-27	CTD4	CTD4	29.2464	–87.9358	NCG	6	2.7	20	–25.8	–24.9	3.52097	4.38829	UGAMS 17592	2014	79.0568	3340	20	0.66	0.002	66.01	0.2	–339.9	2	–329.9	2.4	36
2013-05-16	PE13-27	CTD4	CTD4	29.2464	–87.9358	NCG	55	2.7	20	–28.5	–28.1	4.7315	--	--	--	--	--	--	--	--	--	--	--	--	--	--	36
2013-05-16	PE13-27	CTD4	CTD4	29.2464	–87.9358	NCG	66	2.7	20	–26.3	–25.5	2.69464	--	--	--	--	--	--	--	--	--	--	--	--	--	--	36
2013-05-16	PE13-27	CTD4	CTD4	29.2464	–87.9358	NCG	80	2.7	20	–27.4	–26.7	3.24365	2.0395	UGAMS 17593	2014	40.3449	3440	30	0.651	0.002	65.14	0.2	–348.6	2	–327.6	2.3	36
2013-05-16	PE13-27	CTD4	CTD4	29.2464	–87.9358	NCG	704	2.7	20	–27.9	–26.6	1.72475	2.4641	UGAMS 17594	2014	44.1683	3850	20	0.619	0.002	61.91	0.19	–380.9	1.9	–365.5	2.3	34
2013-05-16	PE13-27	CTD4	CTD4	29.2464	–87.9358	NCG	1031	2.7	20	–28.1	–26.3	1.38018	1.8574	UGAMS 17595	2014	34.9284	3770	30	0.625	0.002	62.54	0.2	–374.6	2	–353.7	2.3	34
2013-05-16	PE13-27	CTD2	CTD2	28.9297	–88.8094	NCG	20	0.7	20	–25.5	–25.1	8.52238	--	--	--	--	--	--	--	--	--	--	--	--	--	--	36
2013-05-16	PE13-27	CTD2	CTD2	28.9297	–88.8094	NCG	34	0.7	20	–23.0	–22.6	10.6282	--	--	--	--	--	--	--	--	--	--	--	--	--	--	36
2013-05-16	PE13-27	CTD2	CTD2	28.9297	–88.8094	NCG	51	0.7	20	–25.0	–24.1	3.33283	--	--	--	--	--	--	--	--	--	--	--	--	--	--	36
2013-05-16	PE13-27	CTD2	CTD2	28.9297	–88.8094	NCG	124	0.7	20	–27.6	–27.4	8.05656	--	--	--	--	--	--	--	--	--	--	--	--	--	--	36
2013-05-16	PE13-27	CTD2	CTD2	28.9297	–88.8094	NCG	385	0.7	20	–24.8	–24.2	4.70571	--	--	--	--	--	--	--	--	--	--	--	--	--	--	35
2013-05-16	PE13-27	CTD2	CTD2	28.9297	–88.8094	NCG	5	2.7	20	–25.2	–24.1	2.28245	--	--	--	--	--	--	--	--	--	--	--	--	--	--	31
2013-05-16	PE13-27	CTD2	CTD2	28.9297	–88.8094	NCG	20	2.7	15	–23.3	–21.7	2.64075	--	--	--	--	--	--	--	--	--	--	--	--	--	--	36
2013-05-16	PE13-27	CTD2	CTD2	28.9297	–88.8094	NCG	34	2.7	20	–22.3	–21.8	9.60187	--	--	--	--	--	--	--	--	--	--	--	--	--	--	36
2013-05-16	PE13-27	CTD2	CTD2	28.9297	–88.8094	NCG	51	2.7	20	–24.7	–23.7	3.34722	--	--	--	--	--	--	--	--	--	--	--	--	--	--	36
2013-05-16	PE13-27	CTD2	CTD2	28.9297	–88.8094	NCG	124	2.7	20	–27.2	–26.4	3.10294	--	--	--	--	--	--	--	--	--	--	--	--	--	--	36
2013-05-16	PE13-27	CTD2	CTD2	28.9297	–88.8094	NCG	385	2.7	20	–26.1	–25.5	5.17347	--	--	--	--	--	--	--	--	--	--	--	--	--	--	35
2013-05-18	PE13-27	CTD6	CTD6	29.4397	–87.2272	NCG	4	0.7	15	–25.5	–24.7	5.4823	--	--	--	--	--	--	--	--	--	--	--	--	--	--	36
2013-05-18	PE13-27	CTD6	CTD6	29.4397	–87.2272	NCG	58	0.7	20	–25.5	–24.8	3.91757	--	--	--	--	--	--	--	--	--	--	--	--	--	--	36
2013-05-18	PE13-27	CTD6	CTD6	29.4397	–87.2272	NCG	70	0.7	12	–27.5	–26.8	5.27497	--	--	--	--	--	--	--	--	--	--	--	--	--	--	36
2013-05-18	PE13-27	CTD6	CTD6	29.4397	–87.2272	NCG	79	0.7	20	–26.5	–25.8	3.99137	--	--	--	--	--	--	--	--	--	--	--	--	--	--	36
2013-05-18	PE13-27	CTD6	CTD6	29.4397	–87.2272	NCG	410	0.7	20	–30.1	–29.0	1.35304	--	--	--	--	--	--	--	--	--	--	--	--	--	--	35
2013-05-18	PE13-27	CTD6	CTD6	29.4397	–87.2272	NCG	4	2.7	20	–25.9	–24.2	1.41041	--	--	--	--	--	--	--	--	--	--	--	--	--	--	36
2013-05-18	PE13-27	CTD6	CTD6	29.4397	–87.2272	NCG	58	2.7	20	–26.4	–24.4	1.20936	--	--	--	--	--	--	--	--	--	--	--	--	--	--	36
2013-05-18	PE13-27	CTD6	CTD6	29.4397	–87.2272	NCG	70	2.7	12	–26.9	–25.4	2.37343	--	--	--	--	--	--	--	--	--	--	--	--	--	--	36
2013-05-18	PE13-27	CTD6	CTD6	29.4397	–87.2272	NCG	79	2.7	20	–27.0	–25.6	1.62298	--	--	--	--	--	--	--	--	--	--	--	--	--	--	36
2013-05-18	PE13-27	CTD6	CTD6	29.4397	–87.2272	NCG	410	2.7	20	–27.7	–24.2	0.897585	--	--	--	--	--	--	--	--	--	--	--	--	--	--	35
2013-05-18	PE13-27	CTD6	CTD6	29.4397	–87.2272	NCG	659	2.7	12	–28.1	–23.6	1.2398	--	--	--	--	--	--	--	--	--	--	--	--	--	--	34
2013-06-12	PE13-31	S1CTD1	GC600	27.4992	–90.8100	Seep	1	0.7	20	–24.1	–23.5	4.81302	--	--	--	--	--	--	--	--	--	--	--	--	--	--	37
2013-06-12	PE13-31	S1CTD1	GC600	27.4992	–90.8100	Seep	75	0.7	20	–25.4	–24.4	2.91776	--	--	--	--	--	--	--	--	--	--	--	--	--	--	37
2013-06-12	PE13-31	S1CTD1	GC600	27.4992	–90.8100	Seep	95	0.7	20	–26.9	–25.9	2.16785	--	--	--	--	--	--	--	--	--	--	--	--	--	--	37
2013-06-12	PE13-31	S1CTD1	GC600	27.4992	–90.8100	Seep	150	0.7	20	–27.6	–27.2	4.89482	--	--	--	--	--	--	--	--	--	--	--	--	--	--	37
2013-06-12	PE13-31	S1CTD2	GC600	27.3753	–90.5672	Seep	250	0.7	20	–27.8	–27.6	10.4638	--	--	--	--	--	--	--	--	--	--	--	--	--	--	37
2013-06-12	PE13-31	S1CTD2	GC600	27.3753	–90.5672	Seep	450	0.7	20	–27.6	–27.3	7.68443	6.05207	UGAMS 17598	2014	114.423	5520	30	0.5031	0.0016	50.31	0.16	–496.9	1.6	–493.4	2.2	37
2013-06-12	PE13-31	S1CTD1	GC600	27.4992	–90.8100	Seep	748	0.7	20	–29.2	–27.3	0.917426	--	--	--	--	--	--	--	--	--	--	--	--	--	--	36
2013-06-12	PE13-31	S1CTD1	GC600	27.4992	–90.8100	Seep	1152	0.7	20	–27.1	–26.7	5.6971	6.18477	UGAMS 17599	2014	113.627	6170	30	0.4638	0.0015	46.38	0.15	–536.2	1.5	–533.7	2.1	36
2013-06-12	PE13-31	S1CTD1	GC600	27.4992	–90.8100	Seep	1	2.7	20	–22.4	–19.3	1.23875	1.2871	LLNL 166156	2014	24.25	825	25	0.902551	0.0026953	90.2551	0.26953	–104.4	2.6953	–43.2	3.6	37
2013-06-12	PE13-31	S1CTD1	GC600	27.4992	–90.8100	Seep	75	2.7	20	–25.9	–23.2	1.0145	0.86362	LLNL 166157	2014	17.0833	2550	30	0.72802	0.0024427	72.802	0.24427	–277.6	2.4427	–215.9	2.6	37
2013-06-12	PE13-31	S1CTD1	GC600	27.4992	–90.8100	Seep	95	2.7	20	–26.7	–23.6	0.867896	0.725741	--	--	14.75	--	--	--	--	--	--	--	--	--	--	37
2013-06-12	PE13-31	S1CTD2	GC600	27.3753	–90.5672	Seep	250	2.7	20	–26.3	–20.7	0.753276	0.433056	--	--	9.5	--	--	--	--	--	--	--	--	--	--	37
2013-06-12	PE13-31	S1CTD2	GC600	27.3753	–90.5672	Seep	450	2.7	20	–27.0	–21.4	0.711149	--	--	--	--	--	--	--	--	--	--	--	--	--	--	37
2013-06-12	PE13-31	S1CTD1	GC600	27.4992	–90.8100	Seep	748	2.7	20	–27.6	–25.2	0.925567	0.752978	--	--	14.75	--	--	--	--	--	--	--	--	--	--	36
2013-06-13	PE13-31	S1CTD3	GC600	27.3742	–90.5708	Seep	1.5	0.7	20	–26.5	–26.1	7.81628	--	--	--	--	--	--	--	--	--	--	--	--	--	--	36
2013-06-13	PE13-31	S1CTD3	GC600	27.3742	–90.5708	Seep	80	0.7	20	–25.6	–24.9	3.95373	--	--	--	--	--	--	--	--	--	--	--	--	--	--	36
2013-06-13	PE13-31	S1CTD3	GC600	27.3742	–90.5708	Seep	92	0.7	20	–27.0	–26.7	7.67537	--	--	--	--	--	--	--	--	--	--	--	--	--	--	36
2013-06-13	PE13-31	S1CTD3	GC600	27.3742	–90.5708	Seep	151	0.7	20	–28.2	–28.0	9.9858	--	--	--	--	--	--	--	--	--	--	--	--	--	--	36
2013-06-13	PE13-31	S1CTD3	GC600	27.3742	–90.5708	Seep	842	0.7	20	–28.3	–26.5	1.27403	--	--	--	--	--	--	--	--	--	--	--	--	--	--	35
2013-06-13	PE13-31	S1CTD3	GC600	27.3742	–90.5708	Seep	1160	0.7	20	–30.6	–30.4	7.89448	--	--	--	--	--	--	--	--	--	--	--	--	--	--	35
2013-06-13	PE13-31	S1CTD3	GC600	27.3742	–90.5708	Seep	1.5	2.7	20	–25.6	–24.3	2.54846	--	--	--	--	--	--	--	--	--	--	--	--	--	--	36
2013-06-13	PE13-31	S1CTD3	GC600	27.3742	–90.5708	Seep	80	2.7	20	–25.3	–22.2	1.19399	--	--	--	--	--	--	--	--	--	--	--	--	--	--	36
2013-06-13	PE13-31	S1CTD5	GC600	27.3797	–90.5731	Seep	1.2	2.7	20	–27.0	–25.4	1.54158	--	--	--	--	--	--	--	--	--	--	--	--	--	--	36
2013-06-13	PE13-31	S1CTD5	GC600	27.3797	–90.5731	Seep	72	2.7	20	–28.7	–28.0	2.61217	--	--	--	--	--	--	--	--	--	--	--	--	--	--	36
2013-06-13	PE13-31	S1CTD5	GC600	27.3797	–90.5731	Seep	90	2.7	20	–25.4	–20.8	0.773753	--	--	--	--	--	--	--	--	--	--	--	--	--	--	36
2013-06-13	PE13-31	S1CTD5	GC600	27.3797	–90.5731	Seep	120	2.7	20	–27.8	–22.3	0.572443	--	--	--	--	--	--	--	--	--	--	--	--	--	--	36
2013-06-13	PE13-31	S1CTD5	GC600	27.3797	–90.5731	Seep	1152	2.7	20	–28.9	–24.0	0.56316	--	--	--	--	--	--	--	--	--	--	--	--	--	--	35
2013-06-13	PE13-31	S1CTD6	GC600	27.3775	–90.5675	Seep	1.5	2.7	20	–26.2	–25.0	2.08804	2.46212	UGAMS 17600	2014	41.4601	4070	30	0.6022	0.0019	60.22	0.19	–397.8	1.9	–383.4	2.3	36
2013-06-13	PE13-31	S1CTD6	GC600	27.3775	–90.5675	Seep	82	2.7	20	–27.3	–26.6	3.78811	--	--	--	--	--	--	--	--	--	--	--	--	--	--	36
2013-06-13	PE13-31	S1CTD6	GC600	27.3775	–90.5675	Seep	98	2.7	20	–27.1	–26.0	1.84782	--	--	--	--	--	--	--	--	--	--	--	--	--	--	36
2013-06-13	PE13-31	S1CTD6	GC600	27.3775	–90.5675	Seep	120	2.7	20	–27.7	–26.8	2.16991	--	--	--	--	--	--	--	--	--	--	--	--	--	--	36
2013-06-13	PE13-31	S1CTD8	GC600	27.2775	–90.5675	Seep	248	2.7	20	–28.7	–25.6	0.855075	--	--	--	--	--	--	--	--	--	--	--	--	--	--	36
2013-06-13	PE13-31	S1CTD6	GC600	27.3775	–90.5675	Seep	328	2.7	20	–28.1	–27.5	4.10166	3.099	UGAMS 17601	2014	53.2489	11140	30	0.2499	0.001	24.99	0.1	–750.1	1	–755.5	2	35
2013-06-13	PE13-31	S1CTD8	GC600	27.2775	–90.5675	Seep	450	2.7	20	–27.9	–25.6	1.18484	0.898849	UGAMS 17604	2014	16.608	7780	30	0.3797	0.0016	37.97	0.16	–620.3	1.6	–617.6	2.1	35
2013-06-13	PE13-31	S1CTD6	GC600	27.3775	–90.5675	Seep	500	2.7	20	–29.1	–28.0	1.44876	1.3999	UGAMS 17602	2014	24.5734	6600	30	0.4398	0.0016	43.98	0.16	–560.2	1.6	–552.1	2.1	34
2013-06-13	PE13-31	S1CTD6	GC600	27.3775	–90.5675	Seep	800	2.7	20	–29.3	–28.3	1.71955	2.02143	UGAMS 17603	2014	35.5657	8260	30	0.3576	0.0013	35.76	0.13	–642.4	1.3	–642.8	2.1	34
2013-06-13	PE13-31	S1CTD6	GC600	27.3775	–90.5675	Seep	1180	2.7	20	–28.0	–24.7	0.918548	1.09927	UGAMS 17605	2014	19.7942	5770	30	0.4872	0.0018	48.72	0.18	–512.8	1.8	–496.1	2.2	35
2013-06-13	PE13-31	S2048	GC600	27.2775	–90.5675	Seep	5	2.7	20	–25.2	–24.8	5.72548	--	--	--	--	--	--	--	--	--	--	--	--	--	--	35
2013-06-14	PE13-31	S4CTD3	GC600	27.5831	–90.8000	Seep	1	0.7	20	–26.2	–25.5	3.99836	--	--	--	--	--	--	--	--	--	--	--	--	--	--	37
2013-06-14	PE13-31	S4CTD3	GC600	27.5831	–90.8000	Seep	75	0.7	20	–26.9	–26.6	7.0545	--	--	--	--	--	--	--	--	--	--	--	--	--	--	37
2013-06-14	PE13-31	S4CTD3	GC600	27.5831	–90.8000	Seep	80	0.7	20	–26.4	–25.9	4.86027	--	--	--	--	--	--	--	--	--	--	--	--	--	--	37
2013-06-14	PE13-31	S4CTD3	GC600	27.5831	–90.8000	Seep	128	0.7	12	–27.9	–27.0	4.09708	--	--	--	--	--	--	--	--	--	--	--	--	--	--	38
2013-06-14	PE13-31	S4CTD3	GC600	27.5831	–90.8000	Seep	390	0.7	20	–27.8	–24.7	0.998218	--	--	--	--	--	--	--	--	--	--	--	--	--	--	37
2013-06-14	PE13-31	S4CTD3	GC600	27.5831	–90.8000	Seep	600	0.7	20	–27.3	–27.0	8.88045	--	--	--	--	--	--	--	--	--	--	--	--	--	--	38
2013-06-14	PE13-31	S4CTD3	GC600	27.5831	–90.8000	Seep	900	0.7	20	–28.3	–27.7	3.55758	--	--	--	--	--	--	--	--	--	--	--	--	--	--	38
2013-06-14	PE13-31	S4CTD3	GC600	27.5831	–90.8000	Seep	1187	0.7	20	–27.0	–26.4	4.24742	--	--	--	--	--	--	--	--	--	--	--	--	--	--	38
2013-06-14	PE13-31	S4CTD2	GC600	27.6019	–90.5719	Seep	90	2.7	20	–27.9	–26.7	1.83502	--	--	--	--	--	--	--	--	--	--	--	--	--	--	37
2013-06-14	PE13-31	S4CTD2	GC600	27.6019	–90.5719	Seep	125	2.7	20	–28.8	–27.4	1.42874	--	--	--	--	--	--	--	--	--	--	--	--	--	--	38
2013-06-14	PE13-31	S4CTD2	GC600	27.6019	–90.5719	Seep	1180	2.7	20	–28.9	–25.8	0.754168	--	--	--	--	--	--	--	--	--	--	--	--	--	--	38
2013-06-22	EN527	2.02	OC26	28.6988	–88.3561	NCG	1	0.7	15	–22.4	–22.4	--	1.22403	UGAMS 29257	2017	18.3604	modern		1.007	0.0031	100.7	0.31	6.96603	3.1	18	14.1177	34.5645
2013-06-22	EN527	2.02	OC26	28.6988	–88.3561	NCG	30	0.7	2.7	–23.4	–23.3	--	7.56719	UGAMS 29258	2017	20.4314	80	25	0.9907	0.003	99.07	0.3	–9.3	3	0	11.9894	36.3144
2013-06-22	EN527	2.02	OC26	28.6988	–88.3561	NCG	200	0.7	16.7	–24.2	–24.2	--	0.612917	UGAMS 29259	2017	10.2357	810	30	0.9037	0.0031	90.37	0.31	–96.3	3.1	–82.8	5.35476	35.8554
2013-06-22	EN527	2.02	OC26	28.6988	–88.3561	NCG	400	0.7	19.2	–24.6	–24.7	--	0.640975	UGAMS 29260	2017	12.3067	1340	30	0.8467	0.0028	84.67	0.28	–153.3	2.8	–145.3	4.71025	35.1086
2013-06-23	EN527	4	MC294	29.1494	–88.0269	Seep	1	0.7	--	–26.3	–25.5	--	--	--	--	--	--	--	--	--	--	--	--	--	--	--	34.3727
2013-06-23	EN527	4	MC294	29.1494	–88.0269	Seep	57	0.7	--	–24.0	–22.7	--	--	--	--	56.5943	--	--	--	--	--	--	--	--	--	--	36.6427
2013-06-23	EN527	4	MC294	29.1494	–88.0269	Seep	100	0.7	--	–30.0	–28.8	--	--	LLNL 166748	2014	21.4167	2185	30	0.761695	0.00246493	76.1695	0.246493	–244.2	2.46493	–186.9	2.7	36.5425
2013-06-23	EN527	4	MC294	29.1494	–88.0269	Seep	150	0.7	--	–30.4	–28.8	--	--	LLNL 166152	2014	15.5833	3365	35	0.657686	0.00252788	65.7686	0.252788	–347.4	2.52788	–289.9	2.5	36.1331
2013-06-23	EN527	4	MC294	29.1494	–88.0269	Seep	1000	0.7	--	–32.4	–31.6	--	--	--	--	--	--	--	--	--	--	--	--	--	--	--	34.9371
2013-06-23	EN527	4	MC294	29.1494	–88.0269	Seep	1441	0.7	--	–34.0	–34.3	--	--	--	--	11.25	--	--	--	--	--	--	--	--	--	--	34.9661
2013-06-23	EN527	4	MC294	29.1494	–88.0269	Seep	1488	0.7	--	–31.2	–30.4	--	--	--	--	12.5833	--	--	--	--	--	--	--	--	--	--	34.9684
2013-06-25	EN527	2.02	OC26	28.6988	–88.3561	NCG	1565	0.7	17.4	–27.2	–28.1	--	0.176256	--	--	3.06685	--	--	--	--	--	--	--	--	--	--	34.9716
2013-06-27	EN527	11.01	MC118	28.8517	–88.4889	Seep	1	0.7	8.2	–21.7	–20.1	7.01532	6.82651	UGAMS 17290	2014	54.364	modern		1.0121	0.0039	101.21	0.39	12.1	3.9	46.3	13.1	36.0129
2013-06-27	EN527	11.01	MC118	28.8517	–88.4889	Seep	50	0.7	19.9	–24.8	–24.1	3.67429	4.85965	UGAMS 17291	2014	91.9607	modern		1.0503	0.003	105.03	0.3	50.3	3	71.2	5.3	36.7718
2013-06-27	EN527	11.01	MC118	28.8517	–88.4889	Seep	150	0.7	19.9	–26.4	–20.9	1.82088	0.452245	--	--	11	--	--	--	--	--	--	--	--	--	--	36.2428
2013-06-27	EN527	11.01	MC118	28.8517	–88.4889	Seep	200	0.7	19.9	–26.8	–22.7	1.87474	0.52483	--	--	12.3333	--	--	--	--	--	--	--	--	--	--	35.8772
2013-06-27	EN527	11.01	MC118	28.8517	–88.4889	Seep	400	0.7	19.9	–27.7	–24.0	1.48313	0.446023	--	--	10.5833	--	--	--	--	--	--	--	--	--	--	35.1487
2013-06-27	EN527	11.01	MC118	28.8517	–88.4889	Seep	840	0.7	19.9	–27.6	–24.4	1.31199	0.48747	--	--	11	--	--	--	--	--	--	--	--	--	--	34.9154
2013-06-28	EN527	12.09	AT357	27.5932	–89.7046	Seep	1	0.7	18.7	–22.6	–21.4	3.38397	3.61179	UGAMS 17294	2014	65.0377	600	20	0.9285	0.0027	92.85	0.27	–71.5	2.7	–46.8	4.2	36.0087
2013-06-28	EN527	12.09	AT357	27.5932	–89.7046	Seep	40	0.7	10	–27.4	–25.5	4.19373	--	--	--	--	--	--	--	--	--	--	--	--	--	--	36.5406
2013-06-28	EN527	12.09	AT357	27.5932	–89.7046	Seep	70	0.7	10	–27.0	–25.1	3.58145	--	--	--	--	--	--	--	--	--	--	--	--	--	--	36.5277
2013-06-28	EN527	12.09	AT357	27.5932	–89.7046	Seep	105	0.7	18.9	–26.8	–25.7	2.73086	--	--	--	--	--	--	--	--	--	--	--	--	--	--	36.5345
2013-06-28	EN527	12.09	AT357	27.5932	–89.7046	Seep	105	0.7	18.9	–26.5	–25.5	2.9087	2.41388	UGAMS 17295	2014	44.8055	1190	20	0.862	0.0026	86.2	0.26	–138	2.6	–105.7	3.2	36.5351
2013-06-28	EN527	12.09	AT357	27.5932	–89.7046	Seep	325	0.7	13.5	–30.3	–28.6	1.95961	0.739808	--	--	11.25	--	--	--	--	--	--	--	--	--	--	35.5199
2013-06-28	EN527	12.09	AT357	27.5932	–89.7046	Seep	705	0.7	18.7	–30.4	–28.9	2.03917	0.645407	--	--	13.8333	--	--	--	--	--	--	--	--	--	--	34.9124
2013-07-01	EN527	14.05	DC673	28.3104	–87.1434	Seep	1	0.7	9.6	–24.6	–20.8	4.4748	--	--	--	--	--	--	--	--	--	--	--	--	--	--	36.195
2013-07-01	EN527	14.06	DC673	28.3104	–87.1434	Seep	20	0.7	18.7	–23.3	–21.8	2.27635	2.74874	UGAMS 17298	2014	47.3545	690	20	0.9174	0.0027	91.74	0.27	–82.6	2.7	–50.7	4	36.2273
2013-07-01	EN527	14.06	DC673	28.3104	–87.1434	Seep	50	0.7	18.9	–23.8	–22.6	3.14608	--	--	--	--	--	--	--	--	--	--	--	--	--	--	36.5115
2013-07-01	EN527	14.06	DC673	28.3104	–87.1434	Seep	73	0.7	6	–25.5	–24.7	10.5853	--	--	--	--	--	--	--	--	--	--	--	--	--	--	36.5179
2013-07-01	EN527	14.06	DC673	28.3104	–87.1434	Seep	100	0.7	19	–28.0	–26.6	2.37666	1.47467	UGAMS 17299	2014	28.5561	1740	30	0.8056	0.0026	80.56	0.26	–194.4	2.6	–147.7	2.9	36.463
2013-07-01	EN527	14.06	DC673	28.3104	–87.1434	Seep	200	0.7	18.9	–31.0	–28.3	0.987558	0.415271	--	--	8.83333	--	--	--	--	--	--	--	--	--	--	36.0212
2013-07-01	EN527	14.05	DC673	28.3104	–87.1434	Seep	900	0.7	16.7	–29.1	–25.2	1.43019	0.523639	--	--	10.1667	--	--	--	--	--	--	--	--	--	--	34.9164
2013-07-01	EN527	14.05	DC673	28.3104	–87.1434	Seep	1325	0.7	16.4	–32.1	–31.0	1.33891	0.602807	--	--	10.8333	--	--	--	--	--	--	--	--	--	--	34.9681
2013-07-01	EN527	14.05	DC673	28.3104	–87.1434	Seep	1365	0.7	16.4	–29.9	–27.9	1.44903	0.740926	--	--	12.75	--	--	--	--	--	--	--	--	--	--	34.9698
2013-07-02	EN527	16.01	MC388	28.6823	–88.2156	NCG	445	0.7	10	–32.1	–31.1	2.5074	--	--	--	--	--	--	--	--	--	--	--	--	--	--	35.0858
2013-07-02	EN527	17.01	MC388	28.7434	–88.2860	NCG	450	0.7	16.7	–32.0	–31.6	2.39491	0.749731	--	--	14.25	--	--	--	--	--	--	--	--	--	--	35.1247
2013-07-02	EN527	17.01	MC388	28.7434	–88.2860	NCG	1200	0.7	10.9	–34.5	–35.2	1.89114	0.74434	--	--	9.33333	--	--	--	--	--	--	--	--	--	--	34.9602
2013-07-02	EN527	18.01	MC388	28.7988	–88.3381	NCG	940	0.7	15	–31.9	–30.6	1.62367	0.684945	--	--	11.5	--	--	--	--	--	--	--	--	--	--	34.9258
2013-07-02	EN527	18.01	MC388	28.7988	–88.3381	NCG	990	0.7	18.9	–30.7	–29.6	2.05956	--	--	--	--	--	--	--	--	--	--	--	--	--	--	34.9331
2013-07-02	EN527	18.01	MC388	28.7988	–88.3381	NCG	1074	0.7	17.4	–31.4	–30.1	1.67793	0.595493	--	--	--	--	--	--	--	--	--	--	--	--	--	34.9445
2013-07-02	EN527	18.01	MC388	28.7988	–88.3381	NCG	1110	0.7	18.2	–29.8	–28.5	1.86669	0.963833	UGAMS 17301	2014	18.3604	5210	30	0.5225	0.0021	52.25	0.21	–477.5	2.1	–450.3	2.3	34.9479
2013-07-02	EN527	18.01	MC388	28.7988	–88.3381	NCG	1160	0.7	18.9	–29.4	–28.1	3.21054	0.798546	UGAMS 17302	2014	17.086	5360	30	0.5128	0.002	51.28	0.2	–487.2	2	–457.4	2.2	34.9513
2013-07-02	EN527	19.03	MC388	28.8532	–88.3814	NCG	1	0.7	18.7	–22.4	–20.3	2.97991	2.76272	UGAMS 17303	2014	50.3813	modern	--	1.0016	0.0029	100.16	0.29	1.6	2.9	38	26.5	36.0618
2013-07-02	EN527	19.01	MC388	28.8532	–88.3814	NCG	525	0.7	17.8	–28.7	–24.2	1.55979	--	--	--	--	--	--	--	--	--	--	--	--	--	--	35.1343
2013-07-02	EN527	19.01	MC388	28.8532	–88.3814	NCG	800	0.7	16.7	–26.7	–23.4	6.05267	0.708927	--	--	14.3777	--	--	--	--	--	--	--	--	--	--	34.9087
2013-07-02	EN527	19.01	MC388	28.8532	–88.3814	NCG	917	0.7	18.2	–27.5	–23.1	2.13295	0.657612	--	--	13.7405	--	--	--	--	--	--	--	--	--	--	34.9214
2013-07-15	EN528	27.18	GC415	27.5464	–91.0038	Seep	1	0.7	--	–23.3	–21.4	--	--	UGAMS 17308	2014	39.7077	260	20	0.9686	0.003	96.86	0.3	–31.4	3	13.1	6.5	36.1268
2013-07-15	EN528	27.13	GC415	27.5539	–90.9944	Seep	88	0.7	--	–25.0	–22.7	--	--	--	--	--	--	--	--	--	--	--	--	--	--	--	36.5059
2013-07-15	EN528	27.13	GC415	27.5539	–90.9944	Seep	600	0.7	--	–27.1	–24.0	--	--	--	--	13.8998	--	--	--	--	--	--	--	--	--	--	34.9441
2013-07-15	EN528	27.18	GC415	27.5464	–91.0038	Seep	900	0.7	--	–27.9	–26.4	--	--	UGAMS 17314	2014	24.7327	2920	30	0.6955	0.0023	69.55	0.23	–304.5	2.3	–263.2	2.5	34.9287
2013-07-20	EN528	32.03		28.8888	–88.9198	NCG	1	0.7	--	–23.1	–21.9	--	--	--	--	--	--	--	--	--	--	--	--	--	--	--	26.2432
2013-07-22	EN528	34.1	Control	28.33	–88.3878	NCG	1	0.7	--	–23.9	–21.9	--	--	UGAMS 17311	2014	46.3986	460	20	0.9446	0.0027	94.46	0.27	–55.4	2.7	–17.0	4.6	35.9894
2013-07-22	EN528	34.1	Control	28.33	–88.3878	NCG	60	0.7	--	–24.3	–21.6	--	--	--	--	--	--	--	--	--	--	--	--	--	--	--	36.506
2013-07-22	EN528	34.1	Control	28.33	–88.3878	NCG	82	0.7	--	–25.4	–24.2	--	--	UGAMS 17312	2014	56.1164	60	20	0.9929	0.0028	99.29	0.28	–7.1	2.8	26.8	12.3	36.5684
2013-07-22	EN528	34.1	Control	28.33	–88.3878	NCG	110	0.7	--	–26.6	–22.2	--	--	--	--	--	--	--	--	--	--	--	--	--	--	--	36.5293
2013-07-23	EN528	38.01	River output	28.7361	–89.4508	NCG	1	0.7	--	–21.7	–20.3	--	--	UGAMS 17316	2014	76.3485	10	20	0.9987	0.0028	99.87	0.28	–1.3	2.8	22.8	28.4	22.5886
2013-07-23	EN528	38.01	River output	28.7361	–89.4508	NCG	98	0.7	--	–24.5	–20.0	--	--	--	--	--	--	--	--	--	--	--	--	--	--	--	36.5021
2013-07-23	EN528	39.01	River output	28.8869	–89.1722	NCG	1	0.7	--	–22.3	–21.0	--	--	UGAMS 17322	2014	61.5329	120	20	0.9857	0.0028	98.57	0.28	–14.3	2.8	15.3	8.8	30.9375
2013-07-23	EN528	39.01	River output	28.8869	–89.1722	NCG	82	0.7	--	–25.0	–21.7	--	--	--	--	--	--	--	--	--	--	--	--	--	--	--	36.4702
2013-07-23	EN528	40.01	River output	29.0772	–88.8908	NCG	1	0.7	--	–22.1	–19.6	--	--	UGAMS 17323	2014	31.583	300	20	0.9634	0.003	96.34	0.3	–36.6	3	21.6	6.1	30.9115
2013-10-04	MISSR	NA	River	29.5139	–89.7148	NCG	1	0.7	--	–28.7	–27.7	--	--	UGAMS 17289	2014	33.8133	1410	30	0.839	0.0027	83.9	0.27	–161	2.7	–118.1	3.2	--
2013-10-04	MISSR	NA	River	29.5139	–89.7148	NCG	1	0.7	--	–28.9	–27.7	--	--	UGAMS 17288	2014	37.796	1060	20	0.8764	0.0027	87.64	0.27	–123.6	2.7	–82.6	3.4	--
2013-10-04	MISSR	NA	River	29.5139	–89.7148	NCG	1	0.7	--	–28.7	–27.3	--	--	--	--	--	--	--	--	--	--	--	--	--	--	--	--
2013-10-04	MISSR	NA	River	29.5139	–89.7148	NCG	1	0.7	--	–28.2	–26.3	--	--	UGAMS 17287	2014	29.6713	2580	30	0.7256	0.0024	72.56	0.24	–274.4	2.4	–238.8	2.6	--
2013-10-04	MISSR	NA	River	29.5139	–89.7148	NCG	1	0.7	--	–28.2	–26.2	--	--	--	--	--	--	--	--	--	--	--	--	--	--	--	--
2013-10-04	MISSR	NA	River	29.5139	–89.7148	NCG	1	0.7	--	–28.4	–26.6	--	--	--	--	--	--	--	--	--	--	--	--	--	--	--	--
2014-03-31	AT26-13	1.02	OC26	28.7	–88.3612	NCG	1	0.7	10.3	–24.5	–24.5	--	1.96817	UGAMS 29251	2017	20.2721	modern	--	1.021	0.0032	102.1	0.32	20.979	3.2	31.4	8.96941	36.2408
2014-03-31	AT26-13	1.02	OC26	28.7	–88.3612	NCG	30	0.7	2.1	–25.0	–25.1	--	3.8121	UGAMS 29252	2017	8.0054	540	30	0.9352	0.0033	93.52	0.33	–64.8	3.3	–44.4	6.1467	36.2383
2014-03-31	AT26-13	1.02	OC26	28.7	–88.3612	NCG	750	0.7	9.1	–27.8	–29.9	--	0.196966	--	--	1.79239	--	--	--	--	--	--	--	--	--	--	34.9072
2014-03-31	AT26-13	1.02	OC26	28.7	–88.3612	NCG	1250	0.7	3.2	–26.4	–26.8	--	1.40644	UGAMS 29254	2017	4.50062	2800	40	0.7054	0.0034	70.54	0.34	–294.6	3.4	–293.9	4.53893	34.96
2014-07-07	PE15-1	P1	P1 River	28.9929	–89.3628	NCG	14.5	0.7	2	–23.4	–23.3	--	62.5106	UGAMS 21537	2015	126.371	1090	20	0.8734	0.0024	87.34	0.24	–126.6	2.4	–125.7	6.20289	36
2014-07-07	PE15-1	P1	P1 River	28.9929	–89.3628	NCG	1	0.7	1.6	–23.6	–23.4	--	48.6663	UGAMS 21538	2015	79.2161	1330	25	0.8472	0.0025	84.72	0.25	–152.8	2.5	–151.9	6.1532	0
2014-07-08	PE15-1	P3	P3 DWH	28.6615	–88.5615	NCG	1450	0.7	12	–28.6	–26.9	--	0.567892	UGAMS 21539	2015	8.16471	4300	40	0.5857	0.0027	58.57	0.27	–414.3	2.7	–455.7	5.89531	35
2014-07-08	PE15-1	P3	P3 DWH	28.6615	–88.5615	NCG	1250	0.7	12	–34.3	–34.1	--	3.7806	UGAMS 21540	2015	46.7172	1450	25	0.8347	0.0024	83.47	0.24	–165.3	2.4	–164.1	6.08721	35
2014-07-08	PE15-1	P3	P3 DWH	28.6615	–88.5615	NCG	1000	0.7	12	–30.2	–29.5	--	1.52374	UGAMS 21541	2015	19.6349	1630	30	0.8163	0.0027	81.63	0.27	–183.7	2.7	–182.1	6.14	35
2014-07-08	PE15-1	P3	P3 DWH	28.6615	–88.5615	NCG	750	0.7	12	–30.4	–29.8	--	1.64322	UGAMS 21542	2015	21.0687	1210	30	0.8599	0.0028	85.99	0.28	–140.1	2.8	–135.7	6.31424	35
2014-07-08	PE15-1	P3	P3 DWH	28.6615	–88.5615	NCG	300	0.7	6	–31.2	–31.0	--	12.0218	UGAMS 21543	2015	73.481	810	20	0.9036	0.0025	90.36	0.25	–96.4	2.5	–94.4	6.4073	35
2014-07-08	PE15-1	P3	P3 DWH	28.6615	–88.5615	NCG	200	0.7	6	–31.2	–30.7	--	3.89712	UGAMS 21544	2015	24.7327	720	25	0.9139	0.0028	91.39	0.28	–86.1	2.8	–79.2	6.67477	35
2014-07-08	PE15-1	P3	P3 DWH	28.6615	–88.5615	NCG	74.5	0.7	6	–27.4	–26.6	--	3.04748	UGAMS 21545	2015	19.6349	4140	30	0.5968	0.0022	59.68	0.22	–403.2	2.2	–417.9	5.83172	36
2014-07-08	PE15-1	P3	P3 DWH	28.6615	–88.5615	NCG	50	0.7	6	–30.6	–30.5	--	14.6239	UGAMS 21546	2015	89.0932	790	25	0.906	0.0026	90.6	0.26	–94.0	2.6	–92.3	6.48022	36
2014-07-08	PE15-1	P3	P3 DWH	28.6615	–88.5615	NCG	25	0.7	6	–26.5	–26.1	--	5.384	UGAMS 21547	2015	33.654	3880	30	0.6171	0.0021	61.71	0.21	–382.9	2.1	–390.3	5.82617	36
2014-07-08	PE15-1	P3	P3 DWH	28.6615	–88.5615	NCG	1	0.7	6	–26.4	–26.1	--	7.48155	UGAMS 21548	2015	46.2393	3760	25	0.6258	0.002	62.58	0.2	–374.2	2	–379.3	5.81668	36
2014-07-09	PE15-1	P4	P4 Loop	27.5332	–88.7563	NCG	1900	0.7	12	–30.2	–29.2	--	0.979438	UGAMS 21549	2015	13.1033	1710	30	0.8084	0.0029	80.84	0.29	–191.6	2.9	–190.1	6.18545	35
2014-07-09	PE15-1	P4	P4 Loop	27.5332	–88.7563	NCG	1500	0.7	12	–30.3	–29.2	--	0.859957	UGAMS 21550	2015	11.6695	1200	30	0.8614	0.0031	86.14	0.31	–138.6	3.1	–130.0	6.45373	35
2014-07-09	PE15-1	P4	P4 Loop	27.5332	–88.7563	NCG	1250	0.7	12	–28.8	–27.6	--	0.886508	UGAMS 21551	2015	11.9881	1240	30	0.8565	0.0031	85.65	0.31	–143.5	3.1	–135.7	6.42957	35
2014-07-09	PE15-1	P4	P4 Loop	27.5332	–88.7563	NCG	1000	0.7	12	–28.6	–27.7	--	1.2715	UGAMS 21552	2015	16.608	4930	30	0.541	0.002	54.1	0.2	–459.0	2	–481.5	5.79399	35
2014-07-09	PE15-1	P4	P4 Loop	27.5332	–88.7563	NCG	350	0.7	6	–30.7	–30.5	--	10.1101	UGAMS 21553	2015	62.0108	580	25	0.9304	0.0029	93.04	0.29	–69.6	2.9	–66.5	6.96626	35
2014-07-09	PE15-1	P4	P4 Loop	27.5332	–88.7563	NCG	150	0.7	6	–31.2	–30.9	--	6.39295	UGAMS 21554	2015	39.7077	770	25	0.9086	0.0027	90.86	0.27	–91.4	2.7	–87.4	6.56059	36
2014-07-09	PE15-1	P4	P4 Loop	27.5332	–88.7563	NCG	90	0.7	6	–28.4	–27.7	--	3.49885	UGAMS 21555	2015	22.3431	1060	30	0.8766	0.0029	87.66	0.29	–123.4	2.9	–118.1	6.44184	36
2014-07-09	PE15-1	P4	P4 Loop	27.5332	–88.7563	NCG	50	0.7	6	–25.2	–24.0	--	2.19784	UGAMS 21556	2015	14.537	2620	30	0.7214	0.0026	72.14	0.26	–278.6	2.6	–286.2	5.97019	36
2014-07-09	PE15-1	P4	P4 Loop	27.5332	–88.7563	NCG	25	0.7	6	–29.3	–29.0	--	7.455	UGAMS 21557	2015	46.08	540	25	0.9354	0.0027	93.54	0.27	–64.6	2.7	–60.4	6.88891	36
2014-07-09	PE15-1	P4	P4 Loop	27.5332	–88.7563	NCG	1	0.7	6	–32.3	–32.2	--	17.1197	UGAMS 21558	2015	104.068	880	20	0.8966	0.0025	89.66	0.25	–103.4	2.5	–102.0	6.36166	36
2015-06-02	EN559	3.01	GC699	27.2927	–90.0402	NCG	1	0.7	15	–24.0	–24.0	--	1.95684	UGAMS 29237	2017	29.3527	modern	--	1.0158	0.0029	101.58	0.29	15.8	2.9	22.8	9.30334	36.2
2015-06-02	EN559	3.01	GC699	27.2927	–90.0402	NCG	77	0.7	18.2	–25.0	–25.1	--	1.11385	UGAMS 29238	2017	20.2721	modern	--	1.0151	0.003	101.51	0.3	15.1	3	25.3	9.74123	36.2
2015-06-02	EN559	3.01	GC699	27.2927	–90.0402	NCG	250	0.7	4.3	–27.6	–29.4	--	0.453883	UGAMS 29239	2017	1.9517	1590	50	0.8205	0.005	82.05	0.5	–179.5	5	–121.1	5.82579	35.8
2015-06-02	EN559	3.01	GC699	27.2927	–90.0402	NCG	1000	0.7	15	–29.1	–30.2	--	0.246939	--	--	3.70408	--	--	--	--	--	--	--	--	--	--	35
2015-06-02	EN559	3.01	GC699	27.2927	–90.0402	NCG	1300	0.7	18.2	–28.5	–29.2	--	0.264793	UGAMS 29241	2017	4.81924	1590	40	0.8206	0.0037	82.06	0.37	–179.4	3.7	–161.1	5.05387	35
2015-06-06	EN559	8.03	BP073	28.6967	–88.3825	NCG	1	0.7	5.2	–24.7	–24.7	--	9.38236	UGAMS 29262	2017	48.7882	modern	--	1.0231	0.0028	102.31	0.28	23.1	2.8	27.4	7.78199	36.5
2015-06-06	EN559	8.03	BP073	28.6967	–88.3825	NCG	41	0.7	10.3	–23.7	–23.7	--	1.6279	--	--	16.7673	--	--	--	--	--	--	--	--	--	--	36.5
2016-07-26	EN586	3.02	GB480	27.4944	–91.9583	NCG	1	0.7	18.5	–22.7	–22.6	--	2.7922	UGAMS 29242	2017	51.6558	430	20	0.9478	0.0026	94.78	0.26	–52.2	2.6	–49.1	5.713	32
2016-07-26	EN586	3.04	GB480	27.4895	–91.9583	NCG	100	0.7	1.4	–35.4	–35.4	--	2.87336	UGAMS 29243	2017	4.0227	5280	50	0.5198	0.003	51.98	0.3	–480.2	3	–514.7	4.22708	36
2016-07-26	EN586	3.04	GB480	27.4895	–91.9583	NCG	250	0.7	35.6	–25.8	–25.9	--	0.31437	UGAMS 29244	2017	11.1916	2670	30	0.7172	0.0025	71.72	0.25	–282.8	2.5	–281.8	4.27979	36
2016-07-26	EN586	3.04	GB480	27.4895	–91.9583	NCG	550	0.7	14.6	–26.3	–26.9	--	0.199147	UGAMS 29245	2017	2.90754	2200	50	0.7596	0.0047	75.96	0.47	–240.4	4.7	–223.9	5.25566	35
2016-07-31	EN586	7.01	GC699	27.2874	–90.0364	NCG	1	0.7	18.9	–23.3	–23.3	--	1.46876	UGAMS 29271	2017	27.7596	170	25	0.9789	0.0029	97.89	0.29	–21.1	2.9	–14.6	8.27004	36
2016-07-31	EN586	7.02	GC699	27.292	–90.0401	NCG	30	0.7	11.1	–23.6	–23.5	--	1.23788	UGAMS 29272	2017	13.7405	modern	--	1.007	0.0032	100.7	0.32	7	3.2	22	14.479	36
2016-07-31	EN586	7.06	GC699	27.289	–90.0388	NCG	700	0.7	15.7	–27.4	–28.2	--	0.215635	UGAMS 29273	2017	3.38547	1050	40	0.8773	0.0045	87.73	0.45	–122.7	4.5	–81.6	6.11305	35
2016-07-31	EN586	7.05	GC699	27.2889	–90.0417	NCG	1376	0.7	14.6	–28.2	–29.0	--	0.264616	--	--	3.86339	--	--	--	--	--	--	--	--	--	--	35
2016-08-05	EN586	12.04	OC26	28.7011	–88.3638	NCG	1	0.7	17.6	–22.5	–22.5	--	1.74018	UGAMS 29264	2017	30.6271	50	20	0.9939	0.0028	99.39	0.28	–6.1	2.8	0.2	13.6651	34
2016-08-05	EN586	12.04	OC26	28.7011	–88.3638	NCG	100	0.7	18.2	–26.4	–26.5	--	0.719959	--	--	13.1033	--	--	--	--	--	--	--	--	--	--	36
2016-08-06	EN586	12.11	OC26	28.6952	–88.3589	NCG	1200	0.7	18.7	–25.4	–25.8	--	0.164003	--	--	3.06685	--	--	--	--	--	--	--	--	--	--	35
2016-08-06	EN586	12.11	OC26	28.6952	–88.3589	NCG	1628	0.7	17.8	–25.8	–26.1	--	0.208095	--	--	3.70408	--	--	--	--	--	--	--	--	--	--	35
2017-06-05	EN600	2.08	SL-23	26.7442	–96.4189	WGOM	7.5	0.7	25.1	–23.4	–23.4	--	2.2611	WHOI 146700	2017	56.7536	>Modern	--	1.0558	0.0021	105.58	0.21	47.3	2.1	51.2	5.27319	36
2017-06-05	EN600	2.08	SL-23	26.7442	–96.4189	WGOM	42.5	0.7	26.3	–24.8	–24.8	--	2.77578	WHOI 146701	2017	73.0031	>Modern	--	1.0199	0.0019	101.99	0.19	11.7	1.9	14.4	7.52484	36
2017-06-05	EN600	2.08	SL-23	26.7442	–96.4189	WGOM	125	0.7	24.5	–26.2	–26.3	--	0.853443	WHOI 146702	2017	20.9093	>Modern	--	1.0047	0.0021	100.47	0.21	–3.4	2.1	5.9	13.7047	36
2017-06-05	EN600	2.08	SL-23	26.7442	–96.4189	WGOM	223	0.7	24.5	–26.9	–27.0	--	0.768912	--	--	18.8383	--	--	--	--	--	--	--	--	--	--	35
2017-06-06	EN600	3.07	PI871	26.1246	–96.3138	WGOM	7.5	0.7	17	–22.8	–22.8	--	3.73203	WHOI 146704	2017	63.4446	>Modern	--	1.0246	0.003	102.46	0.3	16.3	3	19.5	9.42631	36
2017-06-06	EN600	3.07	PI871	26.1246	–96.3138	WGOM	48.5	0.7	21	–23.7	–23.7	--	2.11843	WHOI 146705	2017	44.4869	>Modern	--	1.0212	0.0021	102.12	0.21	13	2.1	17.5	7.79422	36
2017-06-06	EN600	3.07	PI871	26.1246	–96.3138	WGOM	120	0.7	27.5	–24.8	–24.8	--	0.673445	WHOI 146706	2017	18.5197	130	20	0.984	0.0023	98.4	0.23	–23.9	2.3	–14.1	6.69543	36
2017-06-06	EN600	3.07	PI871	26.1246	–96.3138	WGOM	211	0.7	31.6	–29.2	–29.4	--	0.515488	WHOI 146707	2017	16.2894	1800	20	0.799	0.0021	79.9	0.21	–207.4	2.1	–203.7	4.2666	36
2017-06-09	EN600	6.12	GB480	27.4994	–91.9830	NCG	0	0.7	17.4	–22.4	–22.4	--	1.77849	WHOI 146892	2017	30.9458	>Modern	--	1.0078	0.0032	100.78	0.32	–0.34	3.2	6	63.4906	36
2017-06-09	EN600	6.12	GB480	27.4994	–91.9830	NCG	80	0.7	18.9	–25.7	–25.7	--	1.94078	WHOI 146893	2017	36.6808	365	15	0.9557	0.002	95.57	0.2	–52.0	2	–47.6	5.06161	36
2017-06-09	EN600	6.12	GB480	27.4994	–91.9830	NCG	200	0.7	18.7	–24.8	–24.9	--	0.436616	WHOI 146894	2017	8.16471	0	25	0.9997	0.003	99.97	0.3	–8.37	3	16.4	12.5992	36
2017-06-09	EN600	6.12	GB480	27.4994	–91.9830	NCG	300	0.7	17.3	–25.4	–25.6	--	0.389072	WHOI 146895	2017	6.73094	1030	25	0.8799	0.0028	87.99	0.28	–127.2	2.8	–109.1	4.85682	35
2017-06-09	EN600	6.12	GB480	27.4994	–91.9830	NCG	400	0.7	18.5	–27.1	–27.5	--	0.294944	WHOI 146896	2017	5.45647	645	25	0.9226	0.0029	92.26	0.29	–84.8	2.9	–56.3	5.34692	35
2017-06-09	EN600	6.12	GB480	27.4994	–91.9830	NCG	550	0.7	16.4	–28.1	–28.6	--	0.313284	WHOI 146708	2017	5.13786	1790	30	0.8005	0.003	80.05	0.3	–206.0	3	–192.7	4.60388	35
2017-06-09	EN600	6.12	GB480	27.4994	–91.9830	NCG	672	0.7	18.2	–27.4	–27.7	--	0.466117	WHOI 146709	2017	8.48332	3040	40	0.6849	0.0035	68.49	0.35	–320.6	3.5	–322.4	4.52367	35
2017-06-09	EN600	6.12	GB480	27.4994	–91.9830	NCG	745	0.7	36.7	–27.3	–27.5	--	0.326651	--	--	11.9881	--	--	--	--	--	--	--	--	--	--	35
a not available
